# Supplementary figures and images for: Ermin deficiency leads to compromised myelin, inflammatory milieu, and susceptibility to demyelinating insult
Source: PubMed Central journal article supplement — Brain Pathol. 2022 Mar 13;32(5):e13064. doi: 10.1111/bpa.13064 (PMC9425013; doi:10.1111/bpa.13064), 2022-03-13

**A****Fimbriae**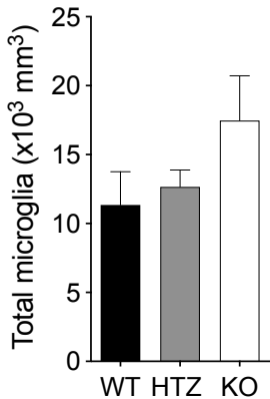**B****Hippocampus**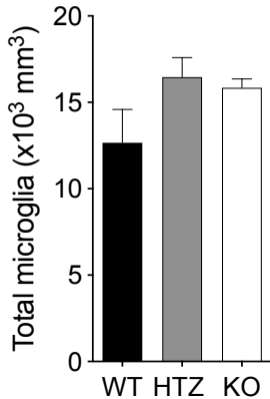**C****Caudate nucleus**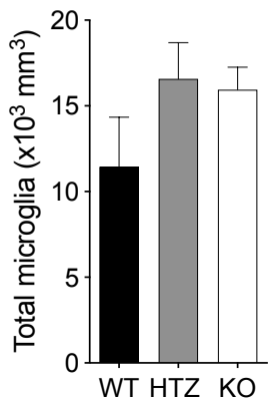

Supplement: BPA-32-e13064-s001.pdf [file BPA-32-e13064-s001.pdf]

**A**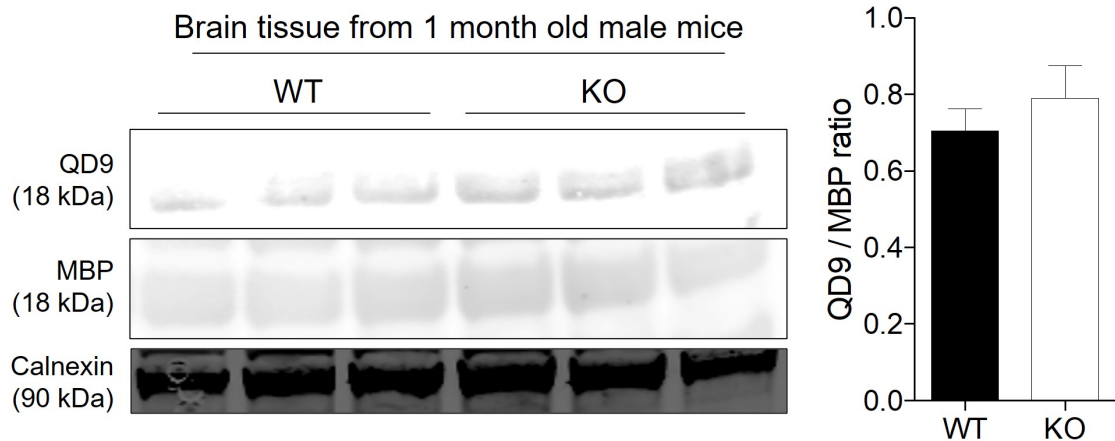**B**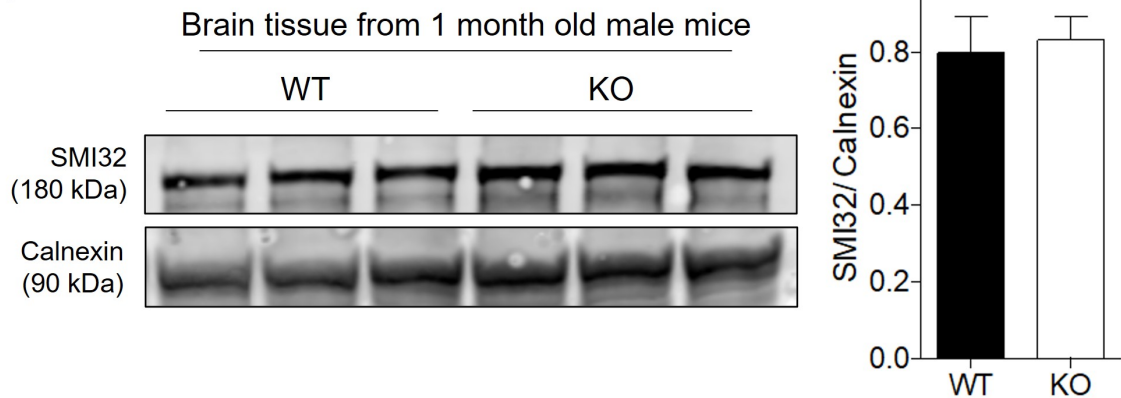

Supplement: BPA-32-e13064-s002.pdf [file BPA-32-e13064-s002.pdf]

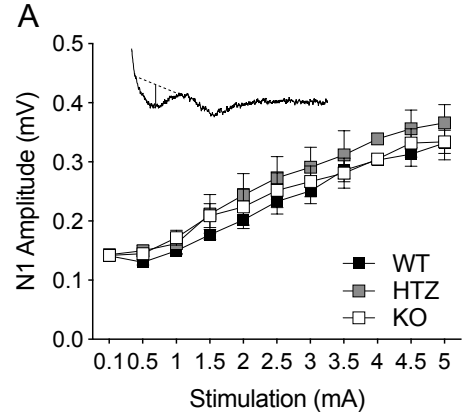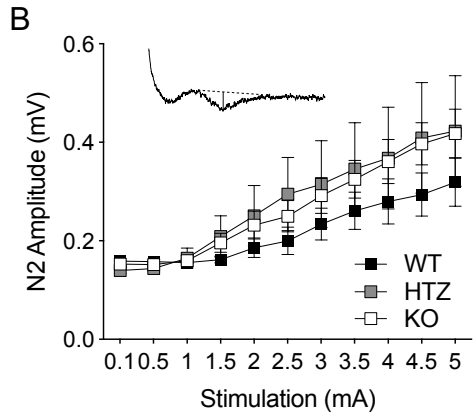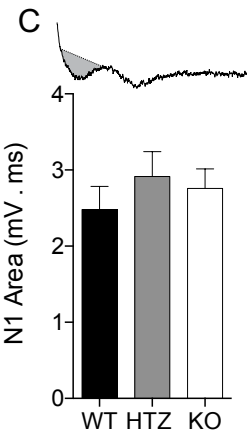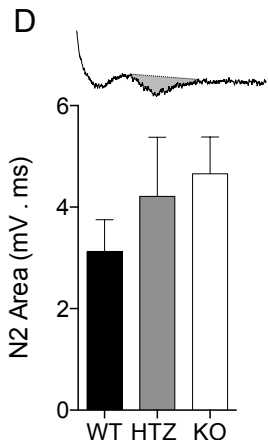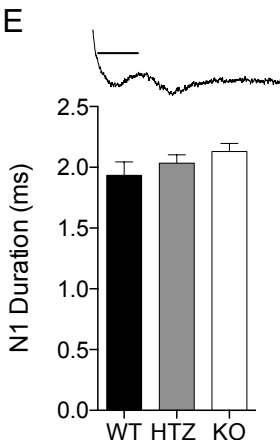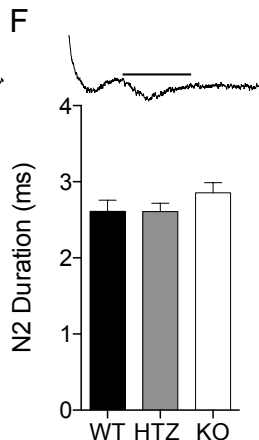

Supplement: BPA-32-e13064-s004.pdf [file BPA-32-e13064-s004.pdf]

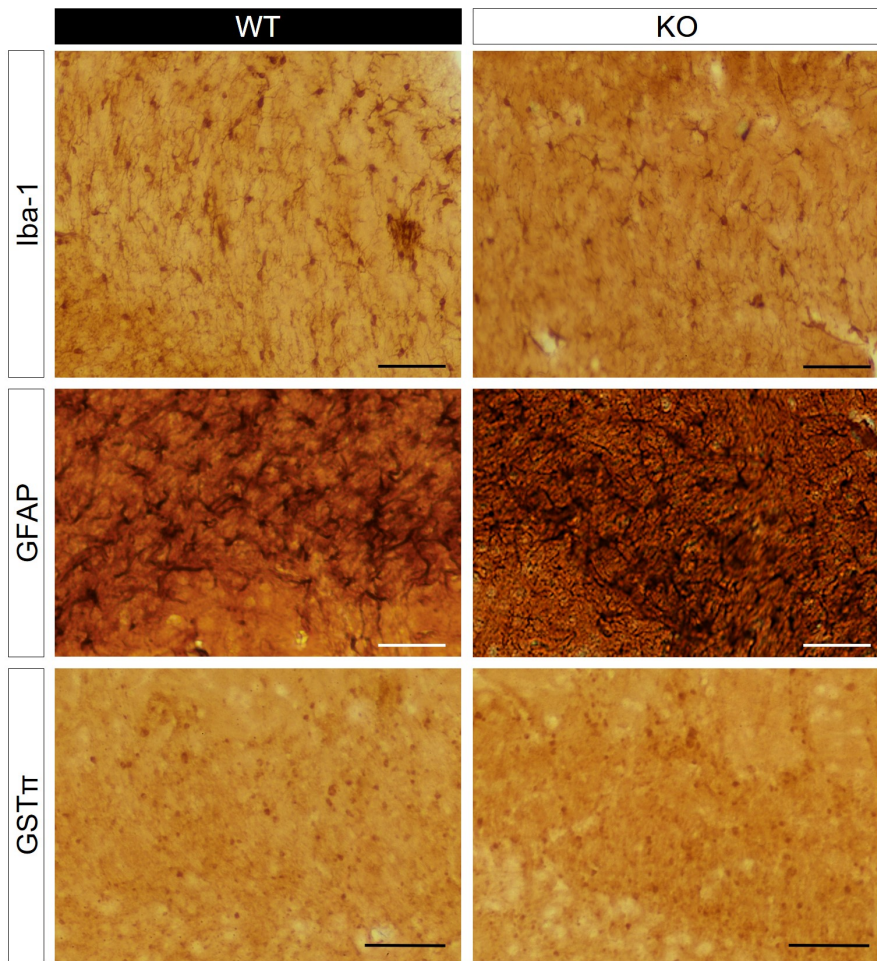

Scale bars = 10 $\mu$ m

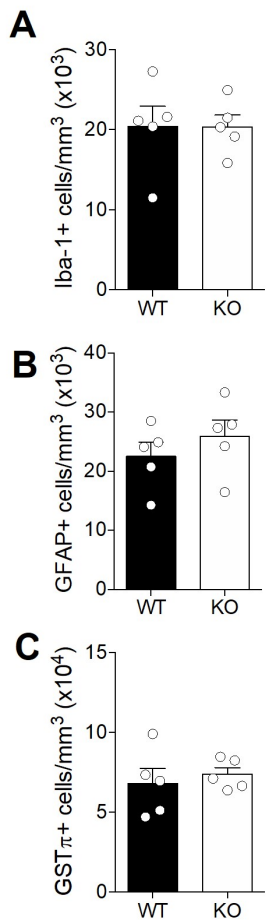

Supplement: BPA-32-e13064-s007.pdf [file BPA-32-e13064-s007.pdf]

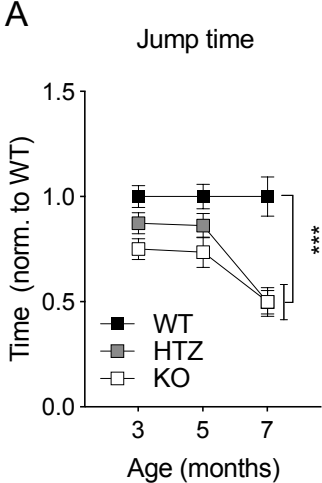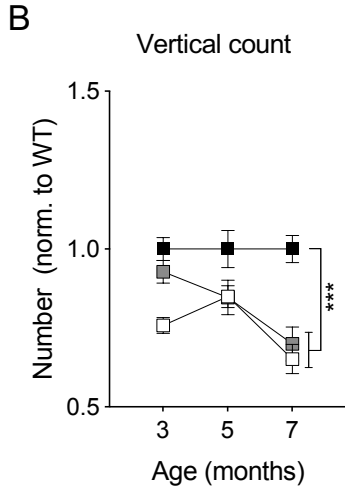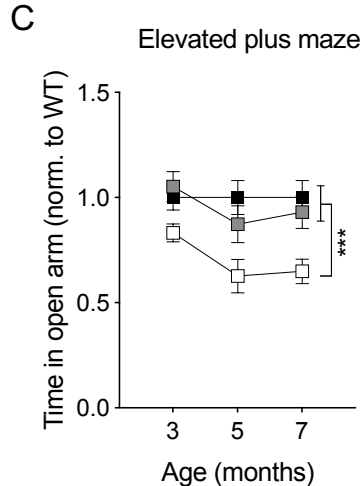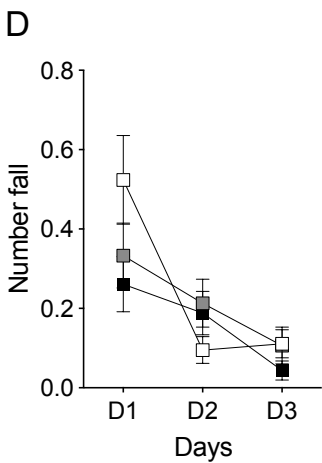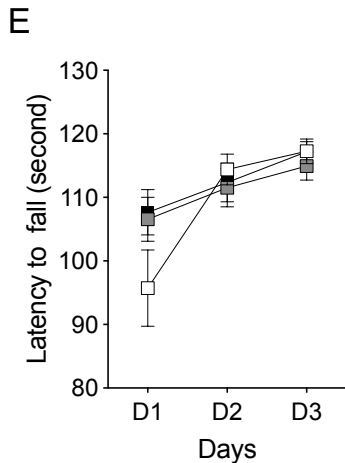

Supplement: BPA-32-e13064-s010.pdf [file BPA-32-e13064-s010.pdf]

**A**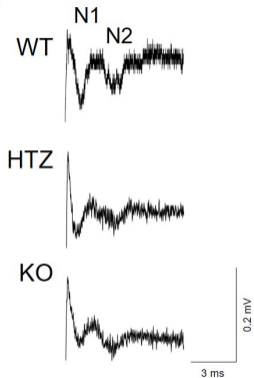**B**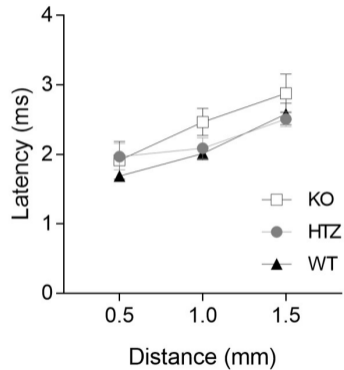**C**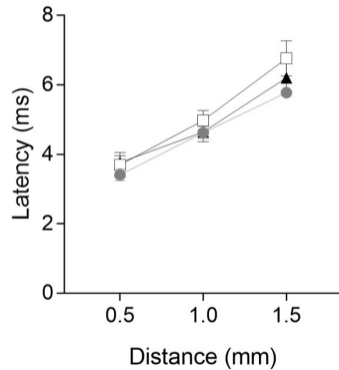

Supplement: BPA-32-e13064-s011.pdf [file BPA-32-e13064-s011.pdf]

WT

HTZ

KO

Ermin  
(42 kDa)

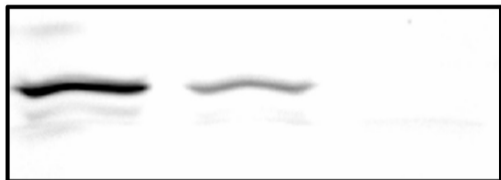

Calnexin  
(90 kDa)

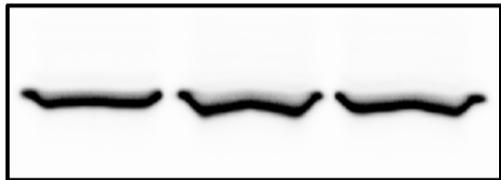

Rabbit pAb, against  
C-terminus of Ermin

Supplement: BPA-32-e13064-s012.pdf [file BPA-32-e13064-s012.pdf]
